# Supplementary material for: Exogenous melatonin mediates radish (Raphanus sativus) and Alternaria brassicae interaction in a dose-dependent manner
Source: Front Plant Sci. 2023 Feb 27;14:1126669. doi: 10.3389/fpls.2023.1126669 (PMC10009256; doi:10.3389/fpls.2023.1126669)
Supplement: Supplementary file 9 [file Table_3.xlsx]

## Sheet: 500VScontrol GO
Top up-regulated and down-regulated GO classifications and KEGG enrichments of MT treated radish DEGs （Go term of 500 μM VS Control）
GO_ID	GO_Term	GO_function	GO_class	S gene number	TS gene number	B gene number	TB gene number	pvalue	down-gene	up-gene
GO:0005618	cell wall	cellular_component	5	128	2282	1244	52078	0		70
GO:0009611	response to wounding	biological_process	5	74	2282	540	52078	0		60
GO:0048046	apoplast	cellular_component	4	118	2282	1119	52078	0		60
GO:0009505	plant-type cell wall	cellular_component	6	86	2282	731	52078	4.44089e-16	51
GO:0009737	response to abscisic acid	biological_process	6	107	2282	1036	52078	5.55112e-16		94
GO:0005576	extracellular region	cellular_component	3	300	2282	4393	52078	5.9952e-15		161
GO:0055114	oxidation-reduction process	biological_process	4	180	2282	2390	52078	1.12343e-12		129
GO:0009269	response to desiccation	biological_process	6	18	2282	52	52078	3.40361e-12		16
GO:0009414	response to water deprivation	biological_process	5	70	2282	685	52078	6.90004e-11		60
GO:0005886	plasma membrane	cellular_component	4	472	2282	8235	52078	1.78331e-10		289
GO:0046658	anchored component of plasma membrane	cellular_component	6	38	2282	276	52078	5.04114e-10	30
GO:0009753	response to jasmonic acid	biological_process	6	49	2282	423	52078	7.96802e-10		42
GO:0004553	hydrolase activity, hydrolyzing O-glycosyl compounds	molecular_function	6	47	2282	458	52078	7.7076e-08	26
GO:0031225	anchored component of membrane	cellular_component	5	46	2282	444	52078	7.96408e-08	38
GO:0042555	MCM complex	cellular_component	4	8	2282	16	52078	1.26023e-07	8
GO:0006268	DNA unwinding involved in DNA replication	biological_process	10	9	2282	25	52078	6.32433e-07	9
GO:0009579	thylakoid	cellular_component	5	45	2282	470	52078	1.00132e-06	31
GO:0006270	DNA replication initiation	biological_process	8	11	2282	50	52078	8.57875e-06	11
GO:0016762	xyloglucan:xyloglucosyl transferase activity	molecular_function	8	12	2282	64	52078	1.91798e-05	7
GO:0000347	THO complex	cellular_component	4	7	2282	22	52078	2.92997e-05	7

## Sheet: 500VScontrol KEGG
Top up-regulated and down-regulated GO classifications and KEGG enrichments of MT treated radish DEGs （KEGG pathway of 500 μM VS Control）
pathway_id	pathway_name	S gene number	TS gene number	B gene number	TB gene number	pvalue	down-gene	up-gene
ko00592	alpha-Linolenic acid metabolism	21	891	117	18687	1.40894e-07		19
ko00920	Sulfur metabolism	16	891	108	18687	5.16609e-05		15
ko00380	Tryptophan metabolism	24	891	218	18687	0.000121249		20
ko00966	Glucosinolate biosynthesis	10	891	66	18687	0.00107616		10
ko04016	MAPK signaling pathway - plant	54	891	745	18687	0.00146116		43
ko04075	Plant hormone signal transduction	74	891	1105	18687	0.00189858		41
ko00630	Glyoxylate and dicarboxylate metabolism	20	891	208	18687	0.00231177	10
ko00071	Fatty acid degradation	15	891	142	18687	0.00322568		14
ko00910	Nitrogen metabolism	13	891	128	18687	0.00812673		11
ko00280	Valine, leucine and isoleucine degradation	16	891	172	18687	0.00823127		15
ko00230	Purine metabolism	34	891	464	18687	0.0088007	20
ko00710	Carbon fixation in photosynthetic organisms	18	891	209	18687	0.0113562	9
ko00052	Galactose metabolism	24	891	309	18687	0.0132389		18
ko00260	Glycine, serine and threonine metabolism	17	891	207	18687	0.0207875	9
ko00196	Photosynthesis - antenna proteins	6	891	48	18687	0.025741	6
ko00040	Pentose and glucuronate interconversions	33	891	492	18687	0.0308924	24
ko00240	Pyrimidine metabolism	28	891	407	18687	0.0336054	18
ko00563	Glycosylphosphatidylinositol(GPI)-anchor biosynthesis	7	891	74	18687	0.0623717	5
ko00195	Photosynthesis	10	891	131	18687	0.0959428	7
ko00072	Synthesis and degradation of ketone bodies	2	891	17	18687	0.193193	1

## Sheet: 500VS1500 GO
Top up-regulated and down-regulated GO classifications and KEGG enrichments of MT treated radish DEGs （Go term of 500 μM VS 1500 μM ）
GO_ID	GO_Term	GO_function	GO_class	S gene number	TS gene number	B gene number	TB gene number	pvalue	down-gene	up-gene
GO:0009416	response to light stimulus	biological_process	6	140	7623	453	52078	0	97
GO:0016021	integral component of membrane	cellular_component	5	1646	7623	9213	52078	0	955
GO:0009507	chloroplast	cellular_component	7	1372	7623	7458	52078	0	718
GO:0016020	membrane	cellular_component	3	748	7623	3812	52078	0	454
GO:0007623	circadian rhythm	biological_process	4	97	7623	217	52078	1.11022e-16		50
GO:0009414	response to water deprivation	biological_process	5	194	7623	685	52078	1.11022e-16		106
GO:0009409	response to cold	biological_process	5	225	7623	831	52078	3.33067e-16		122
GO:0080167	response to karrikin	biological_process	5	123	7623	309	52078	3.33067e-16	90
GO:0005886	plasma membrane	cellular_component	4	1599	7623	8235	52078	6.66134e-16	834
GO:0009611	response to wounding	biological_process	5	151	7623	540	52078	1.11022e-15		76
GO:0009737	response to abscisic acid	biological_process	6	246	7623	1036	52078	3.10862e-15		126
GO:0010200	response to chitin	biological_process	7	105	7623	335	52078	5.77316e-15		78
GO:0009651	response to salt stress	biological_process	6	271	7623	1176	52078	5.9952e-15		152
GO:0055085	transmembrane transport	biological_process	6	163	7623	623	52078	3.43059e-14	114
GO:0005509	calcium ion binding	molecular_function	7	139	7623	537	52078	5.83189e-12		96
GO:0055114	oxidation-reduction process	biological_process	4	466	7623	2390	52078	2.08407e-11	278
GO:0005773	vacuole	cellular_component	6	305	7623	1477	52078	1.53425e-10	159
GO:0006833	water transport	biological_process	7	23	7623	42	52078	1.59712e-09	20
GO:0009570	chloroplast stroma	cellular_component	8	279	7623	1361	52078	1.95634e-09		140
GO:0009751	response to salicylic acid	biological_process	6	105	7623	406	52078	2.20777e-09		54

## Sheet: 500VS1500 KEGG
Top up-regulated and down-regulated GO classifications and KEGG enrichments of MT treated radish DEGs （KEGG pathway of 500 μM VS 1500 μM ）
pathway_id	pathway_name	S gene number	TS gene number	B gene number	TB gene number	pvalue	down-gene	up-gene
ko04712	Circadian rhythm - plant	98	2787	258	18687	0	64
ko00260	Glycine, serine and threonine metabolism	60	2787	207	18687	1.46794e-07	40
ko00280	Valine, leucine and isoleucine degradation	49	2787	172	18687	3.37421e-06		32
ko00051	Fructose and mannose metabolism	49	2787	180	18687	1.32625e-05		30
ko00944	Flavone and flavonol biosynthesis	9	2787	14	18687	3.53221e-05	8
ko00561	Glycerolipid metabolism	70	2787	295	18687	3.83252e-05	42
ko00062	Fatty acid elongation	26	2787	81	18687	7.54623e-05	22
ko00630	Glyoxylate and dicarboxylate metabolism	51	2787	208	18687	0.000174347	32
ko00740	Riboflavin metabolism	21	2787	64	18687	0.000255314	11
ko00920	Sulfur metabolism	30	2787	108	18687	0.000403773	24
ko00906	Carotenoid biosynthesis	32	2787	119	18687	0.000494949	20
ko00330	Arginine and proline metabolism	52	2787	223	18687	0.000554566	28
ko00400	Phenylalanine, tyrosine and tryptophan biosynthesis	37	2787	149	18687	0.0009885		16
ko04075	Plant hormone signal transduction	201	2787	1105	18687	0.00119282		88
ko01040	Biosynthesis of unsaturated fatty acids	21	2787	72	18687	0.00145433		10
ko00592	alpha-Linolenic acid metabolism	30	2787	117	18687	0.00166778		20
ko00650	Butanoate metabolism	18	2787	61	18687	0.00267809		13
ko00250	Alanine, aspartate and glutamate metabolism	34	2787	143	18687	0.00332936		19
ko02010	ABC transporters	45	2787	203	18687	0.0035841		10
ko00290	Valine, leucine and isoleucine biosynthesis	21	2787	78	18687	0.00422336		15

## Sheet: 1500VScontrol GO
Top up-regulated and down-regulated GO classifications and KEGG enrichments of MT treated radish DEGs （Go term of 1500 μM VS control）
GO_ID	GO_Term	GO_function	GO_class	S gene number	TS gene number	B gene number	TB gene number	pvalue	down-gene	up-gene
GO:0080167	response to karrikin	biological_process	5	123	8455	309	52078	0		93
GO:0007623	circadian rhythm	biological_process	4	112	8455	217	52078	2.5481e-33		60
GO:0009507	chloroplast	cellular_component	7	1605	8455	7458	52078	1.11022e-16		815
GO:0009570	chloroplast stroma	cellular_component	8	369	8455	1361	52078	3.33067e-16	227
GO:0009651	response to salt stress	biological_process	6	303	8455	1176	52078	3.33067e-16		170
GO:0016021	integral component of membrane	cellular_component	5	1780	8455	9213	52078	4.44089e-16		1104
GO:0055085	transmembrane transport	biological_process	6	182	8455	623	52078	7.77156e-16		128
GO:0005886	plasma membrane	cellular_component	4	1772	8455	8235	52078	1.11022e-15		1000
GO:0005773	vacuole	cellular_component	6	356	8455	1477	52078	1.77636e-15		207
GO:0055114	oxidation-reduction process	biological_process	4	532	8455	2390	52078	2.44249e-15		356
GO:0009737	response to abscisic acid	biological_process	6	265	8455	1036	52078	7.10543e-15		172
GO:0016020	membrane	cellular_component	3	792	8455	3812	52078	1.14353e-14	285
GO:0009611	response to wounding	biological_process	5	158	8455	540	52078	2.05391e-14	59
GO:0009941	chloroplast envelope	cellular_component	7	287	8455	1165	52078	6.80567e-14	166
GO:0009409	response to cold	biological_process	5	217	8455	831	52078	1.98175e-13	118
GO:0009416	response to light stimulus	biological_process	6	134	8455	453	52078	7.79821e-13	46
GO:0009414	response to water deprivation	biological_process	5	184	8455	685	52078	9.3503e-13	86
GO:0080044	quercetin 7-O-glucosyltransferase activity	molecular_function	8	60	8455	147	52078	1.06248e-12	14
GO:0009751	response to salicylic acid	biological_process	6	123	8455	406	52078	1.10734e-12	50
GO:0080043	quercetin 3-O-glucosyltransferase activity	molecular_function	8	61	8455	152	52078	1.66445e-12	14

## Sheet: 1500VScontrol KEGG
Top up-regulated and down-regulated GO classifications and KEGG enrichments of MT treated radish DEGs (KEGG pathway of 1500 μM VS control)
pathway_id	pathway_name	S gene number	TS gene number	B gene number	TB gene number	pvalue	down-gene	up-gene
ko04712	Circadian rhythm - plant	103	3063	258	18687	0		67
ko00062	Fatty acid elongation	33	3063	81	18687	1.53551e-07		29
ko00920	Sulfur metabolism	40	3063	108	18687	1.73365e-07		33
ko00944	Flavone and flavonol biosynthesis	11	3063	14	18687	5.05931e-07		10
ko00330	Arginine and proline metabolism	65	3063	223	18687	1.19656e-06		41
ko01040	Biosynthesis of unsaturated fatty acids	28	3063	72	18687	3.92667e-06		17
ko00966	Glucosinolate biosynthesis	26	3063	66	18687	6.52399e-06		25
ko00860	Porphyrin and chlorophyll metabolism	42	3063	132	18687	8.57223e-06		22
ko00740	Riboflavin metabolism	25	3063	64	18687	1.16379e-05		13
ko00260	Glycine, serine and threonine metabolism	58	3063	207	18687	1.63431e-05		36
ko00270	Cysteine and methionine metabolism	89	3063	368	18687	6.72641e-05	23
ko00630	Glyoxylate and dicarboxylate metabolism	56	3063	208	18687	7.62226e-05	21
ko00561	Glycerolipid metabolism	74	3063	295	18687	7.85648e-05	31
ko00051	Fructose and mannose metabolism	48	3063	180	18687	0.000304024	28
ko00941	Flavonoid biosynthesis	42	3063	152	18687	0.000313204	6
ko00380	Tryptophan metabolism	55	3063	218	18687	0.000525133	14
ko00592	alpha-Linolenic acid metabolism	33	3063	117	18687	0.000890066	12
ko02010	ABC transporters	51	3063	203	18687	0.00090713	11
ko00071	Fatty acid degradation	38	3063	142	18687	0.00113863	12
ko00261	Monobactam biosynthesis	17	3063	51	18687	0.00228547	5
