# Supplementary material for: Exogenous melatonin mediates radish (Raphanus sativus) and Alternaria brassicae interaction in a dose-dependent manner
Source: Front Plant Sci. 2023 Feb 27;14:1126669. doi: 10.3389/fpls.2023.1126669 (PMC10009256; doi:10.3389/fpls.2023.1126669)
Supplement: Supplementary file 10 [file Table_4.xlsx]

## Sheet: 500VScontrol GO
Top up-regulated and down-regulated GO classifications and KEGG enrichments of MT treated A. brassicae DEGs （Go term of 500 μM VS Control）
GO_ID	GO_Term	GO_function	GO_class	S gene number	TS gene number	B gene number	TB gene number	pvalue	down-gene	up-gene
GO:0022625	cytosolic large ribosomal subunit	cellular_component	8	41	828	59	9352	3.72186e-30	41
GO:0003735	structural constituent of ribosome	molecular_function	4	63	828	169	9352	1.11022e-16	61
GO:0005730	nucleolus	cellular_component	6	37	828	111	9352	3.39617e-13	34
GO:0022627	cytosolic small ribosomal subunit	cellular_component	8	20	828	35	9352	6.34344e-13	20
GO:0006412	translation	biological_process	8	35	828	111	9352	9.19353e-12	33
GO:0002181	cytoplasmic translation	biological_process	9	14	828	27	9352	1.09678e-08	14
GO:0000027	ribosomal large subunit assembly	biological_process	9	12	828	27	9352	1.06656e-06	12
GO:0000462	maturation of SSU-rRNA from tricistronic rRNA transcript (SSU-rRNA, 5.8S rRNA, LSU-rRNA	biological_process	13	12	828	31	9352	6.20223e-06	12
GO:0030687	preribosome, large subunit precursor	cellular_component	6	13	828	37	9352	8.91654e-06	13
GO:0042274	ribosomal small subunit biogenesis	biological_process	6	6	828	8	9352	1.13423e-05	6
GO:0046323	glucose import	biological_process	12	18	828	71	9352	3.18012e-05		11
GO:0055114	oxidation-reduction process	biological_process	4	72	828	508	9352	3.29314e-05		34
GO:0016491	oxidoreductase activity	molecular_function	4	55	828	370	9352	8.00472e-05		21
GO:0005355	glucose transmembrane transporter activity	molecular_function	9	17	828	70	9352	9.40702e-05		11
GO:0005351	carbohydrate:proton symporter activity	molecular_function	7	17	828	70	9352	9.40702e-05		11
GO:0015188	L-isoleucine transmembrane transporter activity	molecular_function	7	6	828	11	9352	0.00014811		3
GO:0045733	acetate catabolic process	biological_process	8	4	828	5	9352	0.000283688		4
GO:0006572	tyrosine catabolic process	biological_process	11	3	828	3	9352	0.000691738		3
GO:0015186	L-glutamine transmembrane transporter activity	molecular_function	7	5	828	10	9352	0.000927939		2
GO:0005887	integral component of plasma membrane	cellular_component	6	30	828	194	9352	0.00175435		22

## Sheet: 500VScontrol KEGG
Top up-regulated and down-regulated GO classifications and KEGG enrichments of MT treated A. brassicae DEGs (KEGG pathway of 500 μM VS Control)
pathway_id	pathway_name	S gene number	TS gene number	B gene number	TB gene number	pvalue	down-gene	up-gene
ko03010	Ribosome	65	363	132	3820	0	65
ko00630	Glyoxylate and dicarboxylate metabolism	14	363	66	3820	0.00296926		10
ko00230	Purine metabolism	23	363	162	3820	0.0308013	15
ko03008	Ribosome biogenesis in eukaryotes	15	363	96	3820	0.0354906	15
ko00010	Glycolysis / Gluconeogenesis	17	363	114	3820	0.0391363	10
ko00561	Glycerolipid metabolism	12	363	75	3820	0.0483641	10
ko00130	Ubiquinone and other terpenoid-quinone biosynthesis	5	363	22	3820	0.0512664	3
ko00620	Pyruvate metabolism	15	363	101	3820	0.0523046		9
ko00760	Nicotinate and nicotinamide metabolism	8	363	45	3820	0.0584376		5
ko00920	Sulfur metabolism	6	363	30	3820	0.0591331	4
ko00650	Butanoate metabolism	8	363	46	3820	0.0651603		5
ko00900	Terpenoid backbone biosynthesis	5	363	24	3820	0.0708505	4
ko00311	Penicillin and cephalosporin biosynthesis	2	363	5	3820	0.0742157		2
ko00250	Alanine, aspartate and glutamate metabolism	9	363	56	3820	0.0791382		6
ko04146	Peroxisome	16	363	117	3820	0.0849757		9
ko00020	Citrate cycle (TCA cycle)	7	363	41	3820	0.0885106		5
ko00450	Selenocompound metabolism	3	363	12	3820	0.0981701	3
ko00310	Lysine degradation	10	363	68	3820	0.106572		6
ko00280	Valine, leucine and isoleucine degradation	12	363	89	3820	0.13425		6
ko00072	Synthesis and degradation of ketone bodies	3	363	14	3820	0.141326	2

## Sheet: 1500VScontrol GO
Top up-regulated and down-regulated GO classifications and KEGG enrichments of MT treated A. brassicae DEGs (GO term of 1500 μM VS Control)
GO_ID	GO_Term	GO_function	GO_class	S gene number	TS gene number	B gene number	TB gene number	pvalue	down-gene	up-gene
GO:0010106	cellular response to iron ion starvation	biological_process	9	4	287	7	9352	2.82636e-05		4
GO:1900551	N',N'',N'''-triacetylfusarinine C biosynthetic process	biological_process	6	3	287	4	9352	0.000111833		3
GO:0006696	ergosterol biosynthetic process	biological_process	9	6	287	27	9352	0.000136161		4
GO:0055114	oxidation-reduction process	biological_process	4	31	287	508	9352	0.000186808	21
GO:0005575	cellular_component	cellular_component	2	139	287	3619	9352	0.000414709		61
GO:0006857	oligopeptide transport	biological_process	9	2	287	2	9352	0.00093861	2
GO:0043231	intracellular membrane-bounded organelle	cellular_component	5	7	287	60	9352	0.00228612	5
GO:0030288	outer membrane-bounded periplasmic space	cellular_component	5	2	287	3	9352	0.00275861		1
GO:0046912	transferase activity, transferring acyl groups, acyl groups converted into alkyl on transfer	molecular_function	6	2	287	3	9352	0.00275861		2
GO:0006572	tyrosine catabolic process	biological_process	11	2	287	3	9352	0.00275861	2
GO:0004451	isocitrate lyase activity	molecular_function	7	2	287	3	9352	0.00275861		2
GO:0008152	metabolic process	biological_process	3	17	287	264	9352	0.00313886		8
GO:0019172	glyoxalase III activity	molecular_function	7	3	287	11	9352	0.00392963	3
GO:0003824	catalytic activity	molecular_function	3	17	287	276	9352	0.00492049	12
GO:0019243	methylglyoxal catabolic process to D-lactate via S-lactoyl-glutathione	biological_process	11	3	287	12	9352	0.00512156	3
GO:0019290	siderophore biosynthetic process	biological_process	6	2	287	4	9352	0.00540539		2
GO:0005887	integral component of plasma membrane	cellular_component	6	13	287	194	9352	0.0067355		7
GO:0004558	alpha-1,4-glucosidase activity	molecular_function	9	2	287	5	9352	0.00882683	2
GO:1900560	austinol biosynthetic process	biological_process	6	3	287	16	9352	0.0119062	3
GO:1900563	dehydroaustinol biosynthetic process	biological_process	6	3	287	16	9352	0.0119062	3

## Sheet: 1500VScontrol KEGG
Top up-regulated and down-regulated GO classifications and KEGG enrichments of MT treated A. brassicae DEGs (KEGG pathway of 1500 μM VS Control)
pathway_id	pathway_name	S gene number	TS gene number	B gene number	TB gene number	pvalue	down-gene	up-gene
ko00630	Glyoxylate and dicarboxylate metabolism	12	120	66	3820	6.23628e-07		6
ko00280	Valine, leucine and isoleucine degradation	11	120	89	3820	8.51953e-05		6
ko00072	Synthesis and degradation of ketone bodies	4	120	14	3820	0.000726353	3
ko00900	Terpenoid backbone biosynthesis	5	120	24	3820	0.000740639	4
ko00350	Tyrosine metabolism	10	120	108	3820	0.00184579	8
ko00404	Staurosporine biosynthesis	3	120	16	3820	0.0125532	2
ko00650	Butanoate metabolism	5	120	46	3820	0.0137817	4
ko00130	Ubiquinone and other terpenoid-quinone biosynthesis	3	120	22	3820	0.0301192	3
ko00620	Pyruvate metabolism	7	120	101	3820	0.0381545	6
ko00360	Phenylalanine metabolism	6	120	82	3820	0.0426748	6
ko00910	Nitrogen metabolism	3	120	26	3820	0.0464636	3
ko00640	Propanoate metabolism	5	120	64	3820	0.049203	3
ko00071	Fatty acid degradation	6	120	89	3820	0.0594556	4	2
ko00310	Lysine degradation	5	120	68	3820	0.0610121	4	1
ko00010	Glycolysis / Gluconeogenesis	7	120	114	3820	0.0656172	6	1
ko02010	ABC transporters	4	120	52	3820	0.0790407	2	2
ko00680	Methane metabolism	4	120	53	3820	0.0835123	3	1
ko00260	Glycine, serine and threonine metabolism	8	120	145	3820	0.08385	4	4
ko00040	Pentose and glucuronate interconversions	5	120	77	3820	0.0929528	3	2
ko00565	Ether lipid metabolism	3	120	37	3820	0.108681	2	1

## Sheet: 500VS1500 GO
Top up-regulated and down-regulated GO classifications and KEGG enrichments of MT treated A. brassicae DEGs (GO term of 500 μM VS 1500 μM)
GO_ID	GO_Term	GO_function	GO_class	S gene number	TS gene number	B gene number	TB gene number	pvalue	down-gene	up-gene
GO:0005730	nucleolus	cellular_component	6	43	985	111	9352	3.9968e-15	40
GO:0030687	preribosome, large subunit precursor	cellular_component	6	14	985	37	9352	1.12321e-05	12
GO:0000462	maturation of SSU-rRNA from tricistronic rRNA transcript (SSU-rRNA, 5.8S rRNA, LSU-rRNA	biological_process	13	11	985	31	9352	0.000193806	11
GO:0005887	integral component of plasma membrane	cellular_component	6	37	985	194	9352	0.000234605		23
GO:0022625	cytosolic large ribosomal subunit	cellular_component	8	16	985	59	9352	0.00028057	15
GO:0055114	oxidation-reduction process	biological_process	4	78	985	508	9352	0.000342139		38
GO:0004004	ATP-dependent RNA helicase activity	molecular_function	11	11	985	33	9352	0.000363534	11
GO:0015188	L-isoleucine transmembrane transporter activity	molecular_function	7	6	985	11	9352	0.000389473		3
GO:0000463	maturation of LSU-rRNA from tricistronic rRNA transcript (SSU-rRNA, 5.8S rRNA, LSU-rRNA	biological_process	13	6	985	11	9352	0.000389473	6
GO:0010501	RNA secondary structure unwinding	biological_process	9	9	985	25	9352	0.000658127	9
GO:0005355	glucose transmembrane transporter activity	molecular_function	9	17	985	70	9352	0.000746671		10
GO:0005351	carbohydrate:proton symporter activity	molecular_function	7	17	985	70	9352	0.000746671		10
GO:0046323	glucose import	biological_process	12	17	985	71	9352	0.0008874		10
GO:0006572	tyrosine catabolic process	biological_process	11	3	985	3	9352	0.00116523		3
GO:0000027	ribosomal large subunit assembly	biological_process	9	9	985	27	9352	0.0012439	8
GO:0032040	small-subunit processome	cellular_component	6	10	985	33	9352	0.00154262	10
GO:0015186	L-glutamine transmembrane transporter activity	molecular_function	7	5	985	10	9352	0.00205446		2
GO:0022857	transmembrane transporter activity	molecular_function	4	17	985	77	9352	0.00229506		13
GO:0016021	integral component of membrane	cellular_component	5	63	985	426	9352	0.00314862		35
GO:0004096	catalase activity	molecular_function	5	4	985	7	9352	0.00329629	4

## Sheet: 500VS1500 KEGG
Top up-regulated and down-regulated GO classifications and KEGG enrichments of MT treated A. brassicae DEGs (KEGG pathway of 500 μM VS 1500 μM)
pathway_id	pathway_name	S gene number	TS gene number	B gene number	TB gene number	pvalue	down-gene	up-gene
ko03008	Ribosome biogenesis in eukaryotes	24	379	96	3820	1.24466e-05	23
ko03020	RNA polymerase	9	379	33	3820	0.00375535	9
ko00350	Tyrosine metabolism	19	379	108	3820	0.00882179		11
ko03010	Ribosome	22	379	132	3820	0.00958726	21
ko02010	ABC transporters	11	379	52	3820	0.0113492	7
ko00280	Valine, leucine and isoleucine degradation	16	379	89	3820	0.0127774	8
ko00260	Glycine, serine and threonine metabolism	23	379	145	3820	0.0146355	14
ko00010	Glycolysis / Gluconeogenesis	18	379	114	3820	0.0301457		12
ko00561	Glycerolipid metabolism	13	379	75	3820	0.0310593	8
ko00650	Butanoate metabolism	9	379	46	3820	0.0339064		6
ko04146	Peroxisome	18	379	117	3820	0.0379382		10
ko00072	Synthesis and degradation of ketone bodies	4	379	14	3820	0.0427363		3
ko00630	Glyoxylate and dicarboxylate metabolism	11	379	66	3820	0.0577278		7
ko00620	Pyruvate metabolism	15	379	101	3820	0.0710092		10
ko00760	Nicotinate and nicotinamide metabolism	8	379	45	3820	0.0717995		5
ko00311	Penicillin and cephalosporin biosynthesis	2	379	5	3820	0.0802033		2
ko00330	Arginine and proline metabolism	13	379	88	3820	0.0916948		10
ko00380	Tryptophan metabolism	15	379	108	3820	0.111273	8
ko00780	Biotin metabolism	5	379	27	3820	0.122721	3
ko00333	Prodigiosin biosyntheses	4	379	20	3820	0.129625	3
