# Supplementary material for: Exogenous melatonin mediates radish (Raphanus sativus) and Alternaria brassicae interaction in a dose-dependent manner
Source: Front Plant Sci. 2023 Feb 27;14:1126669. doi: 10.3389/fpls.2023.1126669 (PMC10009256; doi:10.3389/fpls.2023.1126669)
Supplement: Supplementary file 11 [file Table_5.xlsx]

## Sheet: Alternarai GO 500 vs Control
Top up-regulated and down-regulated GO classifications and KEGG enrichments of MT treated A. brassicae DEGs in dual RNA-Seq analysis (GO term of 500 μM VS Control)
GO_ID	GO_Term	GO_function	GO_class	S gene number	TS gene number	B gene number	TB gene number	pvalue	down-gene	up-gene
GO:1903475	mitotic actomyosin contractile ring assembly	biological_process	8	2	52	7	9352	0.000625577	2
GO:0008559	xenobiotic transmembrane transporting ATPase activity	molecular_function	9	2	52	10	9352	0.00132627	1
GO:0046983	protein dimerization activity	molecular_function	5	2	52	10	9352	0.00132627	2
GO:0051015	actin filament binding	molecular_function	7	2	52	13	9352	0.00227445	2
GO:0005886	plasma membrane	cellular_component	4	6	52	248	9352	0.00239936	5
GO:0110055	negative regulation of actin filament annealing	biological_process	10	1	52	1	9352	0.00556031	1
GO:0004363	glutathione synthase activity	molecular_function	7	1	52	1	9352	0.00556031	1
GO:0032263	GMP salvage	biological_process	10	1	52	1	9352	0.00556031	1
GO:0006869	lipid transport	biological_process	7	1	52	1	9352	0.00556031		1
GO:0071846	actin filament debranching	biological_process	6	1	52	1	9352	0.00556031	1
GO:0006437	tyrosyl-tRNA aminoacylation	biological_process	13	1	52	1	9352	0.00556031	1
GO:0034967	Set3 complex	cellular_component	8	1	52	3	9352	0.0165901		1
GO:0035690	cellular response to drug	biological_process	6	3	52	110	9352	0.0230608		1
GO:0003714	transcription corepressor activity	molecular_function	5	1	52	6	9352	0.0329102		1
GO:0016575	histone deacetylation	biological_process	11	1	52	10	9352	0.0542577		1
GO:0042626	ATPase activity, coupled to transmembrane movement of substances	molecular_function	8	1	52	26	9352	0.135121		1
GO:0043231	intracellular membrane-bounded organelle	cellular_component	5	1	52	60	9352	0.2851		1
GO:0006357	regulation of transcription by RNA polymerase II	biological_process	9	1	52	68	9352	0.316497		1
GO:0016021	integral component of membrane	cellular_component	5	3	52	426	9352	0.424573		1
GO:0005575	cellular_component	cellular_component	2	17	52	3619	9352	0.849741		1

## Sheet: Alternaria GO 1500 vs Control
Top up-regulated and down-regulated GO classifications and KEGG enrichments of MT treated A. brassicae DEGs in dual RNA-Seq analysis (GO term of 1500 μM VS Control)
GO_ID	GO_Term	GO_function	GO_class	S gene number	TS gene number	B gene number	TB gene number	pvalue	down-gene	up-gene
GO:0005739	mitochondrion	cellular_component	6	14	136	309	9352	0.000154742	14
GO:2000601	positive regulation of Arp2/3 complex-mediated actin nucleation	biological_process	11	2	136	2	9352	0.000209947	2
GO:0045733	acetate catabolic process	biological_process	8	2	136	5	9352	0.00203993	2
GO:0005829	cytosol	cellular_component	6	24	136	907	9352	0.00271278	24
GO:0031597	cytosolic proteasome complex	cellular_component	6	2	136	6	9352	0.00303077	2
GO:0036402	proteasome-activating ATPase activity	molecular_function	11	2	136	6	9352	0.00303077	2
GO:0015976	carbon utilization	biological_process	3	3	136	22	9352	0.00378379	3
GO:0031595	nuclear proteasome complex	cellular_component	6	2	136	8	9352	0.00555038	2
GO:0030479	actin cortical patch	cellular_component	6	3	136	26	9352	0.00612344	3
GO:0009514	glyoxysome	cellular_component	8	3	136	26	9352	0.00612344	3
GO:0031966	mitochondrial membrane	cellular_component	5	2	136	13	9352	0.0147436		1
GO:0035690	cellular response to drug	biological_process	6	5	136	110	9352	0.0219398		1
GO:0055114	oxidation-reduction process	biological_process	4	13	136	508	9352	0.0333061		1
GO:0003735	structural constituent of ribosome	molecular_function	4	6	136	169	9352	0.0366075		1
GO:0005886	plasma membrane	cellular_component	4	7	136	248	9352	0.0696968		1
GO:0005762	mitochondrial large ribosomal subunit	cellular_component	9	2	136	33	9352	0.0827443		1
GO:0016614	oxidoreductase activity, acting on CH-OH group of donors	molecular_function	5	2	136	35	9352	0.0915356		1
GO:0005355	glucose transmembrane transporter activity	molecular_function	9	1	136	70	9352	0.642732		1
GO:0005351	carbohydrate:proton symporter activity	molecular_function	7	1	136	70	9352	0.642732		1
GO:0046323	glucose import	biological_process	12	1	136	71	9352	0.647966		1

## Sheet: Alternaria GO 1500 vs 500
Top up-regulated and down-regulated GO classifications and KEGG enrichments of MT treated A. brassicae DEGs in dual RNA-Seq analysis (GO term of 1500 μM VS 500 μM)
GO_ID	GO_Term	GO_function	GO_class	S gene number	TS gene number	B gene number	TB gene number	pvalue	down-gene	up-gene
GO:0005575	cellular_component	cellular_component	2	3	3	3619	9352	0.0579204	3
GO:0008152	metabolic process	biological_process	3	1	3	264	9352	0.0823281	1
GO:0003824	catalytic activity	molecular_function	3	1	3	276	9352	0.0859589	1
GO:0008150	biological_process	biological_process	2	2	3	2728	9352	0.205601	2
GO:0003674	molecular_function	molecular_function	2	2	3	2734	9352	0.206397	2

## Sheet: Alternaria KEGG 500 vs Control
Top up-regulated and down-regulated GO classifications and KEGG enrichments of MT treated A. brassicae DEGs in dual RNA-Seq analysis (KEGG pathway of 500 μM VS Control)
pathway_id	pathway_name	S gene number	TS gene number	B gene number	TB gene number	pvalue	down-gene	up-gene
ko02010	ABC transporters	3	28	52	3820	0.00613159	2
ko00620	Pyruvate metabolism	3	28	101	3820	0.0364163	3
ko00591	Linoleic acid metabolism	1	28	7	3820	0.0502329	1
ko00250	Alanine, aspartate and glutamate metabolism	2	28	56	3820	0.0625786	2
ko00450	Selenocompound metabolism	1	28	12	3820	0.0846144	1
ko00330	Arginine and proline metabolism	2	28	88	3820	0.135032	2
ko00190	Oxidative phosphorylation	2	28	88	3820	0.135032	2
ko00290	Valine, leucine and isoleucine biosynthesis	1	28	20	3820	0.137142	1
ko00780	Biotin metabolism	1	28	27	3820	0.180709	1
ko00920	Sulfur metabolism	1	28	30	3820	0.198724	1
ko03020	RNA polymerase	1	28	33	3820	0.216357	1
ko04011	MAPK signaling pathway - yeast	2	28	122	3820	0.224552	2
ko00860	Porphyrin and chlorophyll metabolism	1	28	36	3820	0.233616	1
ko00020	Citrate cycle (TCA cycle)	1	28	41	3820	0.261568	1
ko00270	Cysteine and methionine metabolism	1	28	59	3820	0.354284	1
ko00040	Pentose and glucuronate interconversions	1	28	77	3820	0.435723	1
ko00051	Fructose and mannose metabolism	1	28	80	3820	0.448295	1
ko00970	Aminoacyl-tRNA biosynthesis	1	28	93	3820	0.499722	1
ko03008	Ribosome biogenesis in eukaryotes	1	28	96	3820	0.510916		1
ko00520	Amino sugar and nucleotide sugar metabolism	1	28	102	3820	0.532584	1
ko00240	Pyrimidine metabolism	1	28	106	3820	0.546511	1
ko03013	RNA transport	1	28	110	3820	0.560038	1
ko04144	Endocytosis	1	28	113	3820	0.569927	1
ko04111	Cell cycle - yeast	1	28	116	3820	0.579602	1
ko03040	Spliceosome	1	28	119	3820	0.589066	1
ko03010	Ribosome	1	28	132	3820	0.627758	1
ko00500	Starch and sucrose metabolism	1	28	137	3820	0.641683		1
ko04141	Protein processing in endoplasmic reticulum	1	28	144	3820	0.660337	1
ko00230	Purine metabolism	1	28	162	3820	0.704106	1

## Sheet: Alternaria KEGG 1500 vs 0
Top up-regulated and down-regulated GO classifications and KEGG enrichments of MT treated A. brassicae DEGs (KEGG pathway of 1500 μM VS Control)
pathway_id	pathway_name	S gene number	TS gene number	B gene number	TB gene number	pvalue	down-gene	up-gene
ko00620	Pyruvate metabolism	8	71	101	3820	0.000485382	8
ko00680	Methane metabolism	5	71	53	3820	0.00276246	5
ko03050	Proteasome	4	71	40	3820	0.00604578	4
ko00640	Propanoate metabolism	5	71	64	3820	0.0062688	5
ko00280	Valine, leucine and isoleucine degradation	5	71	89	3820	0.0238956	5
ko00630	Glyoxylate and dicarboxylate metabolism	4	71	66	3820	0.0332658	4
ko00300	Lysine biosynthesis	2	71	20	3820	0.0521722	2
ko00130	Ubiquinone and other terpenoid-quinone biosynthesis	2	71	22	3820	0.0619495	2
ko00730	Thiamine metabolism	3	71	51	3820	0.0679993	3
ko02010	ABC transporters	3	71	52	3820	0.0712345		1
ko00591	Linoleic acid metabolism	1	71	7	3820	0.123162	1
ko03010	Ribosome	3	71	132	3820	0.447272		1
ko04113	Meiosis - yeast	1	71	130	3820	0.916383		1

## Sheet: Alternaria KEGG 1500 vs 500
Top up-regulated and down-regulated GO classifications and KEGG enrichments of MT treated A. brassicae DEGs in dual RNA-Seq analysis (KEGG pathway of 1500 μM VS 500 μM)
pathway_id	pathway_name	S gene number	TS gene number	B gene number	TB gene number	pvalue	down-gene	up-gene
ko00500	Starch and sucrose metabolism	1	1	137	3820	0.0358639	1

## Sheet: Radish GO 500 VS control 
Top up-regulated and down-regulated GO classifications and KEGG enrichments of MT treated diseased radish DEGs in dual RNA-Seq analysis (GO term of 500 μM VS Control)
GO_ID	GO_Term	GO_function	GO_class	S gene number	TS gene number	B gene number	TB gene number	pvalue	down-gene	up-gene
GO:0010200	response to chitin	biological_process	7	76	1389	335	52078	5.55112e-16	74
GO:0009737	response to abscisic acid	biological_process	6	79	1389	1036	52078	7.77156e-16	58
GO:0009414	response to water deprivation	biological_process	5	58	1389	685	52078	1.79856e-14	47
GO:0009409	response to cold	biological_process	5	59	1389	831	52078	1.72844e-11	45
GO:0009522	photosystem I	cellular_component	7	15	1389	60	52078	3.94301e-11		10
GO:0043565	sequence-specific DNA binding	molecular_function	7	80	1389	1383	52078	1.33674e-10	66
GO:0016168	chlorophyll binding	molecular_function	6	15	1389	72	52078	6.34962e-10		9
GO:0042742	defense response to bacterium	biological_process	8	50	1389	723	52078	1.44967e-09	41
GO:0009523	photosystem II	cellular_component	7	13	1389	56	52078	2.13009e-09		8
GO:0005886	plasma membrane	cellular_component	4	299	1389	8235	52078	8.21238e-09	183
GO:0009611	response to wounding	biological_process	5	39	1389	540	52078	2.88305e-08	33
GO:0019438	aromatic compound biosynthetic process	biological_process	6	8	1389	21	52078	3.74913e-08	8
GO:0015979	photosynthesis	biological_process	5	23	1389	224	52078	4.37748e-08		13
GO:0009768	photosynthesis, light harvesting in photosystem I	biological_process	7	11	1389	50	52078	6.72066e-08		11
GO:0071492	cellular response to UV-A	biological_process	9	5	1389	6	52078	7.86353e-08	5
GO:0030076	light-harvesting complex	cellular_component	4	10	1389	41	52078	9.3165e-08		10
GO:0009769	photosynthesis, light harvesting in photosystem II	biological_process	7	6	1389	11	52078	1.4669e-07		6
GO:0031409	pigment binding	molecular_function	4	10	1389	47	52078	3.72135e-07		10
GO:0009535	chloroplast thylakoid membrane	cellular_component	8	39	1389	714	52078	2.59591e-05		23
GO:0010114	response to red light	biological_process	8	13	1389	136	52078	7.63347e-05		8

## Sheet: Radish 1500M VS control GO
Top up-regulated and down-regulated GO classifications and KEGG enrichments of MT treated diseased radish DEGs in dual RNA-Seq analysis (GO term of 1500 μM VS Control)
GO_ID	GO_Term	GO_function	GO_class	S gene number	TS gene number	B gene number	TB gene number	pvalue	down-gene	up-gene
GO:0010200	response to chitin	biological_process	7	82	2398	335	52078	0	74
GO:0042742	defense response to bacterium	biological_process	8	88	2398	723	52078	4.44089e-16	53
GO:0009611	response to wounding	biological_process	5	62	2398	540	52078	5.30557e-11	32
GO:0006979	response to oxidative stress	biological_process	5	65	2398	592	52078	1.23359e-10	45
GO:0043565	sequence-specific DNA binding	molecular_function	7	117	2398	1383	52078	2.46809e-10	80
GO:0009409	response to cold	biological_process	5	80	2398	831	52078	5.92984e-10	58
GO:0009737	response to abscisic acid	biological_process	6	93	2398	1036	52078	9.3572e-10	64
GO:0009751	response to salicylic acid	biological_process	6	48	2398	406	52078	2.93578e-09	28
GO:0034605	cellular response to heat	biological_process	6	15	2398	54	52078	1.33831e-08	13
GO:0009414	response to water deprivation	biological_process	5	65	2398	685	52078	4.03816e-08	50
GO:0009723	response to ethylene	biological_process	6	36	2398	335	52078	2.55651e-06		18
GO:0048046	apoplast	cellular_component	4	86	2398	1119	52078	3.0886e-06		51
GO:0019253	reductive pentose-phosphate cycle	biological_process	8	11	2398	53	52078	2.45336e-05		7
GO:0010105	negative regulation of ethylene-activated signaling pathway	biological_process	11	9	2398	36	52078	2.78442e-05		5
GO:0009627	systemic acquired resistance	biological_process	7	15	2398	97	52078	3.70928e-05		11
GO:1901657	glycosyl compound metabolic process	biological_process	6	13	2398	76	52078	4.08853e-05		8
GO:0004553	hydrolase activity, hydrolyzing O-glycosyl compounds	molecular_function	6	40	2398	458	52078	9.59571e-05		27
GO:0008271	secondary active sulfate transmembrane transporter activity	molecular_function	9	7	2398	25	52078	0.000100441		4
GO:0008422	beta-glucosidase activity	molecular_function	8	15	2398	111	52078	0.000178338		9
GO:0055069	zinc ion homeostasis	biological_process	11	6	2398	20	52078	0.000209951		6

## Sheet: Radish GO 1500VSA500
Top up-regulated and down-regulated GO classifications and KEGG enrichments of MT treated diseased radish DEGs in dual RNA-Seq analysis (GO term of 1500 μM VS 500 μM)
GO_ID	GO_Term	GO_function	GO_class	S gene number	TS gene number	B gene number	TB gene number	pvalue	down-gene	up-gene
GO:0009769	photosynthesis, light harvesting in photosystem II	biological_process	7	8	1070	11	52078	4.83426e-12	8
GO:0051707	response to other organism	biological_process	6	16	1070	144	52078	5.34113e-08	8
GO:0010287	plastoglobule	cellular_component	8	17	1070	168	52078	8.26723e-08	13
GO:0030076	light-harvesting complex	cellular_component	4	9	1070	41	52078	1.22515e-07	9
GO:0009523	photosystem II	cellular_component	7	10	1070	56	52078	1.94505e-07	9
GO:0031409	pigment binding	molecular_function	4	9	1070	47	52078	4.26727e-07	9
GO:0009768	photosynthesis, light harvesting in photosystem I	biological_process	7	9	1070	50	52078	7.42517e-07	9
GO:0008289	lipid binding	molecular_function	4	23	1070	345	52078	1.02623e-06	12
GO:1900056	negative regulation of leaf senescence	biological_process	10	7	1070	30	52078	2.04171e-06	5
GO:0016168	chlorophyll binding	molecular_function	6	10	1070	72	52078	2.17764e-06	9
GO:0016020	membrane	cellular_component	3	119	1070	3812	52078	3.80624e-06		74
GO:0048046	apoplast	cellular_component	4	47	1070	1119	52078	4.32541e-06		29
GO:0030001	metal ion transport	biological_process	8	13	1070	146	52078	1.10956e-05		8
GO:0009507	chloroplast	cellular_component	7	201	1070	7458	52078	2.86502e-05		100
GO:0080187	floral organ senescence	biological_process	5	5	1070	19	52078	3.31883e-05		4
GO:0005788	endoplasmic reticulum lumen	cellular_component	7	9	1070	80	52078	3.96733e-05		9
GO:0009737	response to abscisic acid	biological_process	6	41	1070	1036	52078	6.53461e-05		25
GO:0080151	positive regulation of salicylic acid mediated signaling pathway	biological_process	9	4	1070	13	52078	0.000109263		3
GO:0005886	plasma membrane	cellular_component	4	214	1070	8235	52078	0.000134782		126
GO:0032973	amino acid export across plasma membrane	biological_process	12	4	1070	14	52078	0.000150479		4

## Sheet: Radish KEGG 500VScontrol 
Top up-regulated and down-regulated GO classifications and KEGG enrichments of MT treated diseased radish DEGs in dual RNA-Seq analysis (KEGG term of 500 μM VS Control)
pathway_id	pathway_name	S gene number	TS gene number	B gene number	TB gene number	pvalue	down-gene	up-gene
ko04016	MAPK signaling pathway - plant	46	500	745	18687	1.25406e-07	41
ko00196	Photosynthesis - antenna proteins	10	500	48	18687	4.51318e-07		10
ko04626	Plant-pathogen interaction	48	500	931	18687	1.07848e-05	45
ko00909	Sesquiterpenoid and triterpenoid biosynthesis	9	500	96	18687	0.00107959		9
ko00440	Phosphonate and phosphinate metabolism	5	500	37	18687	0.00288954	4
ko00650	Butanoate metabolism	6	500	61	18687	0.00569956	4
ko00906	Carotenoid biosynthesis	8	500	119	18687	0.0146949	6
ko00565	Ether lipid metabolism	7	500	110	18687	0.0283611	5
ko00592	alpha-Linolenic acid metabolism	7	500	117	18687	0.0378137	6
ko00944	Flavone and flavonol biosynthesis	2	500	14	18687	0.0525762	2
ko00290	Valine, leucine and isoleucine biosynthesis	5	500	78	18687	0.0579091		3
ko00052	Galactose metabolism	13	500	309	18687	0.0731117	8
ko03015	mRNA surveillance pathway	20	500	530	18687	0.0783195	14
ko00770	Pantothenate and CoA biosynthesis	6	500	114	18687	0.085682		4
ko00902	Monoterpenoid biosynthesis	2	500	20	18687	0.0989331		1
ko00330	Arginine and proline metabolism	9	500	223	18687	0.145248		6
ko01051	Biosynthesis of ansamycins	1	500	6	18687	0.150195		1
ko00920	Sulfur metabolism	5	500	108	18687	0.163566		4
ko04136	Autophagy - other eukaryotes	5	500	114	18687	0.19051		3

[truncated: 2 more sheets: Radish 1500 VS Control KEGG, Radish 1500VSA500 KEGG]
